# Supplementary material
Source: MDPI journal article supplement (https://www.mdpi.com/2076-3417/14/9/3605)
Supplement: s1 [file s1]

## Supplementary Materials

# Phase Behavior and Rheological Properties of AES/CAPB/H<sub>2</sub>O Ternary System

Xinran Wu, Guangyan Zhang \* and Peng Wang

School of Materials and Chemical Engineering, Hubei University of Technology, Wuhan 430068, P.R. China; wuxinranhbut@163.com (X.W.); 20071027@hbut.edu.cn (P.W.)

\* Correspondence: Correspondence: gyzhang@hbut.edu.cn (G.Z.)

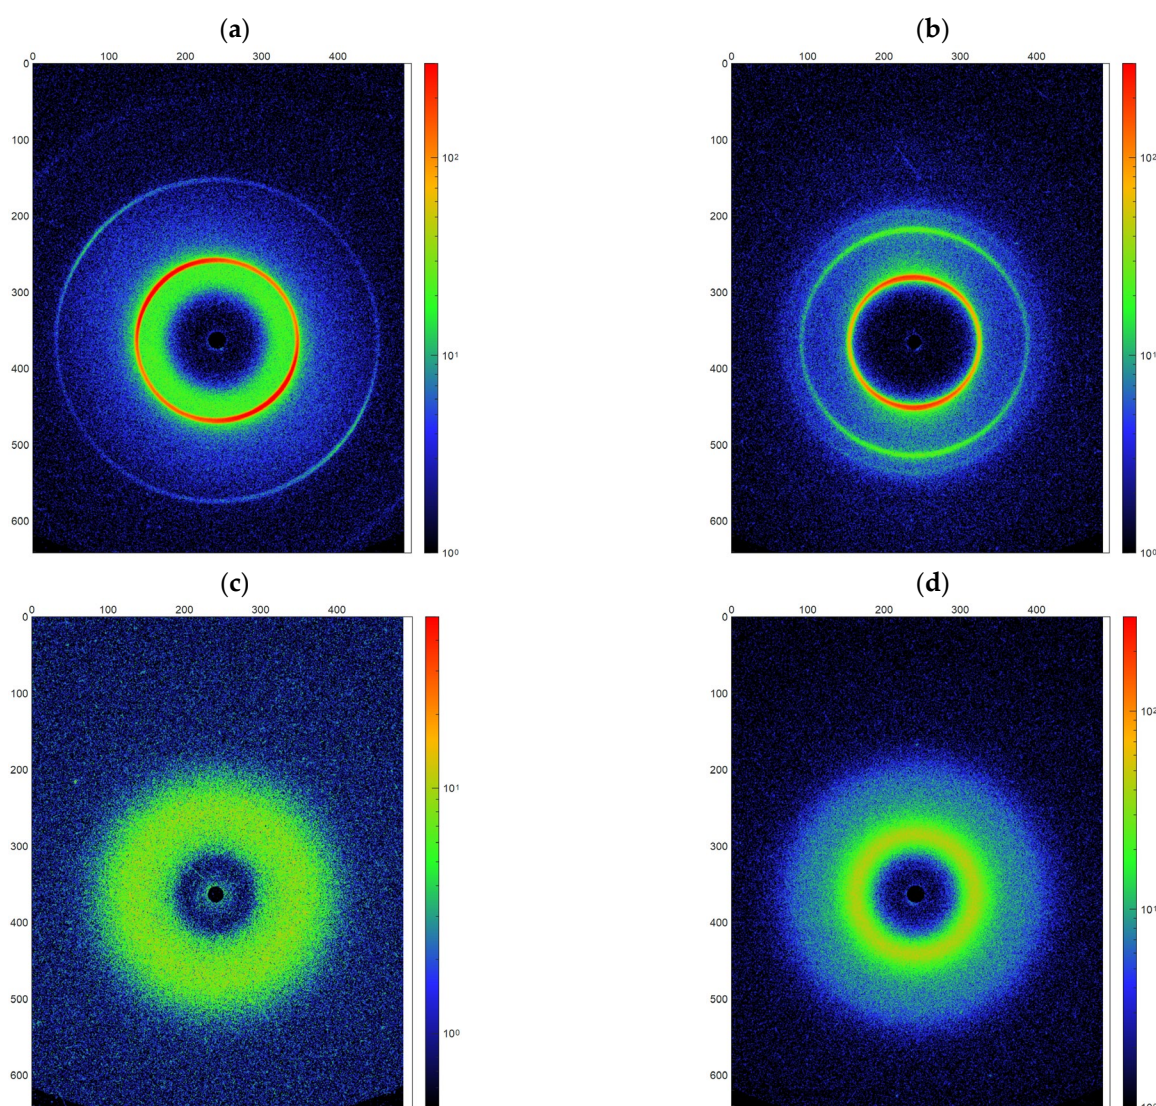

**Figure S1.** The two-dimensional SAXS patterns of (a) sample  $\alpha$ , (b) sample  $\beta$ , (c) sample  $\delta$  and (d) sample  $\epsilon$  at 25°C.
